# Supplementary material for: Low-crystallinity mesoporous NiGaFe hydroxide nanosheets on macroporous Ni foam for high-efficiency oxygen evolution electrocatalysis
Source: Royal Society of Chemistry journal article supplement (doi:10.1039/d1ta00122a), 2021-01-01
Supplement: d1ta00122a1.pdf [file d1ta00122a1.pdf]

*Supporting Information for*

**Low-Crystallinity Mesoporous NiGaFe Hydroxide Nanosheets on Macroporous  
Ni Foam for High-Efficiency Oxygen Evolution Electrocatalysis**

Shi Feng Zai,<sup>‡</sup> An Qi Dong,<sup>‡</sup> Jian Li, Zi Wen, Chun Cheng Yang,<sup>\*</sup> Qing Jiang<sup>\*</sup>

---

*Key Laboratory of Automobile Materials (Jilin University), Ministry of Education, and School of Materials Science and Engineering, Jilin University, Changchun 130022, China*

*\* Corresponding authors. Tel.: +86-431-85095371; Fax: +86-431-85095876; E-mails: ccyang@jlu.edu.cn (C. C. Yang); jiangq@jlu.edu.cn (Q. Jiang).*

<sup>†</sup> Electronic Supplementary Information (ESI) available. See DOI: 10.1039/x0xx00000x

<sup>‡</sup> These authors contributed equally to this work.

## Materials and methods

*Materials:* Nickel nitrate hexahydrate  $[\text{Ni}(\text{NO}_3)_2 \cdot 6\text{H}_2\text{O}]$  was purchased from Sinopharm Chemical Reagent Co., Ltd. Gallium nitrate hydrate  $[\text{Ga}(\text{NO}_3)_3 \cdot x\text{H}_2\text{O}]$ , ferric nitrate nonahydrate  $[\text{Fe}(\text{NO}_3)_3 \cdot 9\text{H}_2\text{O}]$  and potassium hydroxide (KOH) were obtained from Shanghai Aladdin Biochemical Technology Co. Ltd. Highly purified  $\text{N}_2$  and  $\text{O}_2$  were supplied by Changchun Juyang Gas Co. Ltd.

*Catalyst Preparation:* Before electrodeposition, the Ni foam (NF) support was pre-cleaned with 5 M HCl for 20 min to remove the surface nickel oxides layer, and then rinsed with water and ethanol and dried in a vacuum drying oven for further use. Subsequently, electrodeposition was carried out in a three-electrode system using the above cleaned NF as the working electrode, Ag/AgCl (saturated KCl solution) as the reference electrode and a graphite rod as the counter electrode, respectively. In a typical procedure, NF support was first subjected to an ultrasonic pretreatment for 600 s to ensure the electrolyte permeation, where the electrolyte bath contained 25 mM  $\text{Ga}(\text{NO}_3)_3 \cdot x\text{H}_2\text{O}$ , 22.5 mM  $\text{Ni}(\text{NO}_3)_2 \cdot 6\text{H}_2\text{O}$  and 2.5 mM  $\text{Fe}(\text{NO}_3)_2 \cdot 9\text{H}_2\text{O}$ . The  $\text{Ni}_{0.65}\text{Ga}_{0.30}\text{Fe}_{0.05}/\text{NF}$  was synthesized through a potentiostatic electrodeposition at -1.0 V vs. Ag/AgCl at 5 °C for 500 s. After electrodeposition, the resulting electrode was carefully washed with water and ethanol and dried in a vacuum drying oven, obtaining the  $\text{Ni}_{0.65}\text{Ga}_{0.30}\text{Fe}_{0.05}/\text{NF}$  electrode. In order to investigate the effect of Fe content on OER catalytic activity, three comparative electrodes were prepared by regulating the molar ratios of Ni, Ga, Fe nitrate salts (5:5:0, 4.8:5:0.2, and 4:5:1) using a similar procedure to that described for  $\text{Ni}_{0.65}\text{Ga}_{0.30}\text{Fe}_{0.05}/\text{NF}$  (the corresponding molar ratio is 4.5:5:0.5). Note that these electrodes are labeled herein based on the actual molar ratios determined by inductively coupled plasma-optical emission spectroscopy (ICP-OES). For comparisons, different crystalline-degrees were obtained by the post-annealing

treatment of as-obtained  $\text{Ni}_{0.65}\text{Ga}_{0.30}\text{Fe}_{0.05}/\text{NF}$  at 300 and 500 °C (denoted as  $T_a = 300$  °C and  $T_a = 500$  °C).

*Material Characterization:* The morphology and structure characterizations were carried out on a field-emission scanning electron microscope (SEM, JSM-6700F, JEOL, 15 kV) and a transmission electron microscope (TEM, JEM-2100F, JEOL, 200 kV). The chemical composition analysis was examined by a JSM-6700F equipped with an energy-dispersive X-ray spectrum (EDS). X-ray diffraction (XRD) patterns were recorded on a D/max2500pc diffractometer using  $\text{Cu K}\alpha$  radiation. X-ray photoelectron spectroscopy (XPS) was performed on a Thermo ESCALAB-250 spectrometer with a monochromatic  $\text{Al-K}\alpha$  source. Raman spectra were obtained on a micro-Raman spectrometer (Renishaw) with a laser of 532-nm excitation wavelength at 0.2 mW. Fourier transform infrared spectroscopy (FTIR) measurements were performed by using an FTIR spectroscopy (6800-50/NEXUS, Thermo Nicolet, USA). ICP-OES (Jobin-Yvon) was carried out to evaluate the ratios of metal elements. The nitrogen adsorption and desorption measurements were conducted on a Micromeritics ASAP 2020 analyzer to obtain the specific area and pore size distribution.

*Electrochemical Measurements:* Electrochemical measurements were carried out in oxygen-saturated 1 M KOH electrolyte at room temperature. The electrocatalytic processes were performed in a typical three-electrode system with the as-prepared samples as the working electrode,  $\text{Ag}/\text{AgCl}$  (saturated KCl solution) as the reference electrode, a graphite rod as the counter electrode. To circumvent the possible influence of Fe impurities on catalytic performance, the KOH electrolyte was purified by homemade  $\text{Ni}(\text{OH})_2$  sediments according to previous work.<sup>1</sup> Electrochemical impedance spectroscopy (EIS) was performed under an initial potential of 1.5 V vs. reversible hydrogen electrode (RHE) while sweeping the frequency from 100 kHz to

10 mHz and maintaining an AC amplitude of 10 mV. The polarization curve was performed at a scan rate of 1 mV s<sup>-1</sup> and the potential was calibrated and converted to a RHE scale by  $E (\text{vs. RHE}) = E (\text{vs. Ag/AgCl}) + 0.197 + 0.059 \times \text{pH}$ . Moreover, a gas chromatograph [GC-2014 equipped with a thermal conductivity detector (TCD) and a 5 Å Molecular sieve column] was utilized to determine Faradic efficiencies during the OER processes.

*Computational Method:* All calculations were performed by spin-polarized DFT in the Dmol3 code of the Materials Studio 2017 software.<sup>2</sup> The generalized gradient approximation with Perdew-Burke-Ernzerhof functional (GGA-PBE)<sup>3</sup> was applied to describe the exchange correlation effects. DFT semicore pseudopotentials core treatment with the basis set of double numerical plus polarization (DNP) was implemented for relativistic effects.<sup>4</sup> The periodic structure was created with a 20 Å vacuum slab to avoid the artificial interaction effect between the slab and their mirror images, and a 1×3×1 Monkhorst-Pack K-point was sampled in the Brillouin zone. Grimme method for DFT-D correction was applied to describe the van der Waals forces.<sup>5</sup> For geometry relaxation, the convergence criteria of energy change, gradient, and the displacement were set to be 1.0×10<sup>-5</sup> Ha, 1.05×10<sup>-3</sup> Ha Å<sup>-1</sup>, and 9.4×10<sup>-3</sup> Å, respectively. The bottom two layers were fixed and considered as a bulk structure. The geometrical configurations and charge density difference plots were illustrated with VESTA software.<sup>6</sup>

The computational hydrogen electrode (CHE) model was used to obtain the free energies.<sup>7</sup> The reference potential was set to be reversible hydrogen electrode (RHE),<sup>8</sup> where the chemical potential of the proton-electron pair was determined by one-half of chemical potential of H<sub>2</sub>. In alkaline conditions, the OER process occurs *via* four elementary steps:

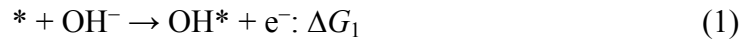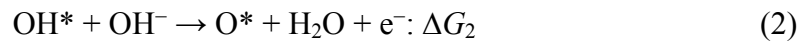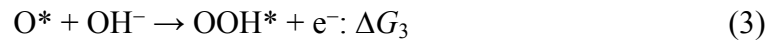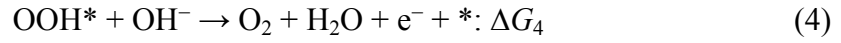

The reaction free energy ( $\Delta G$ ) was determined by the difference between the total energy of products and reactants at each step. As a result, the theoretical overpotential  $\eta$  can be obtained from the Gibbs free energy as follows:  $\eta = \max[\Delta G_1, \Delta G_2, \Delta G_3, \Delta G_4]/e - 1.23[\text{V}]$ .

## Supplementary Figures

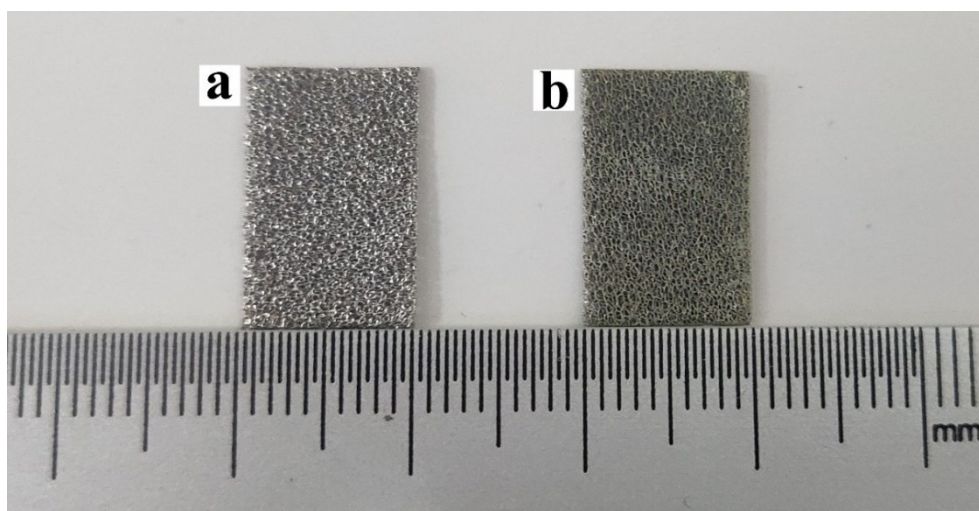

**Fig. S1** Photographs of (a) NF support and (b)  $\text{Ni}_{0.65}\text{Ga}_{0.30}\text{Fe}_{0.05}/\text{NF}$ .

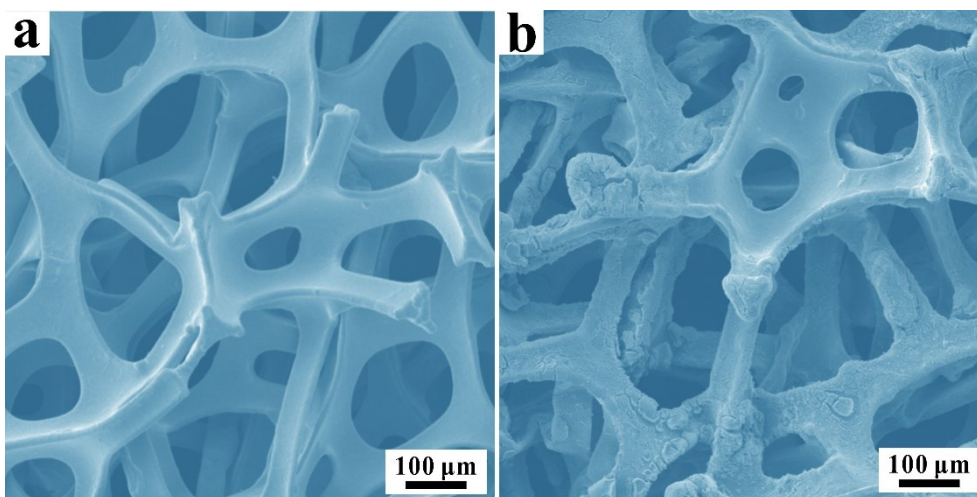

**Fig. S2** Low-magnification SEM images of (a) NF support and (b) Ni<sub>0.65</sub>Ga<sub>0.30</sub>Fe<sub>0.05</sub>/NF.

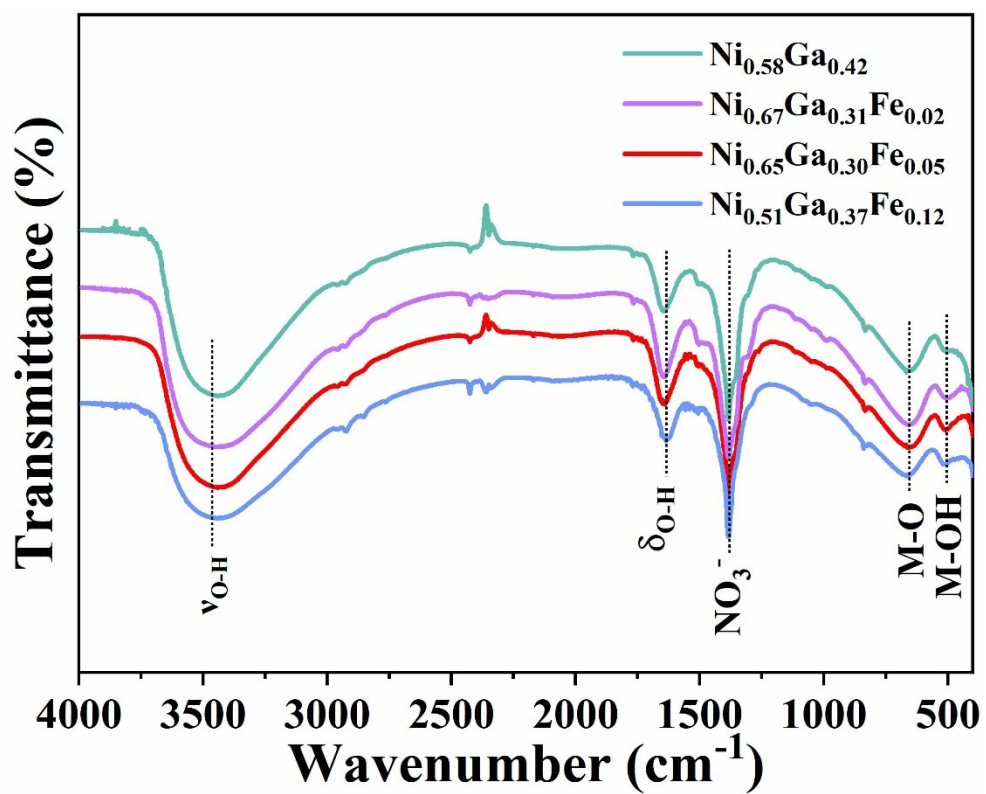

Fig. S3 FTIR spectra of Ni<sub>0.58</sub>Ga<sub>0.42</sub>, Ni<sub>0.67</sub>Ga<sub>0.31</sub>Fe<sub>0.02</sub>, Ni<sub>0.65</sub>Ga<sub>0.30</sub>Fe<sub>0.05</sub> and Ni<sub>0.51</sub>Ga<sub>0.37</sub>Fe<sub>0.12</sub>.



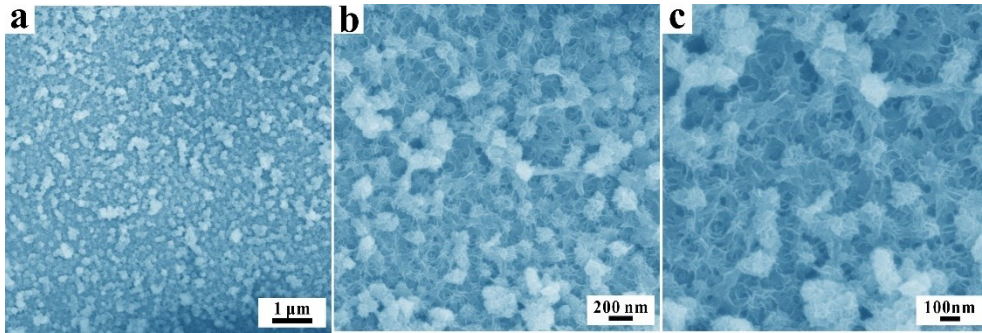

**Fig. S4** SEM images of  $\text{Ni}_{0.65}\text{Ga}_{0.30}\text{Fe}_{0.05}/\text{NF}$ .

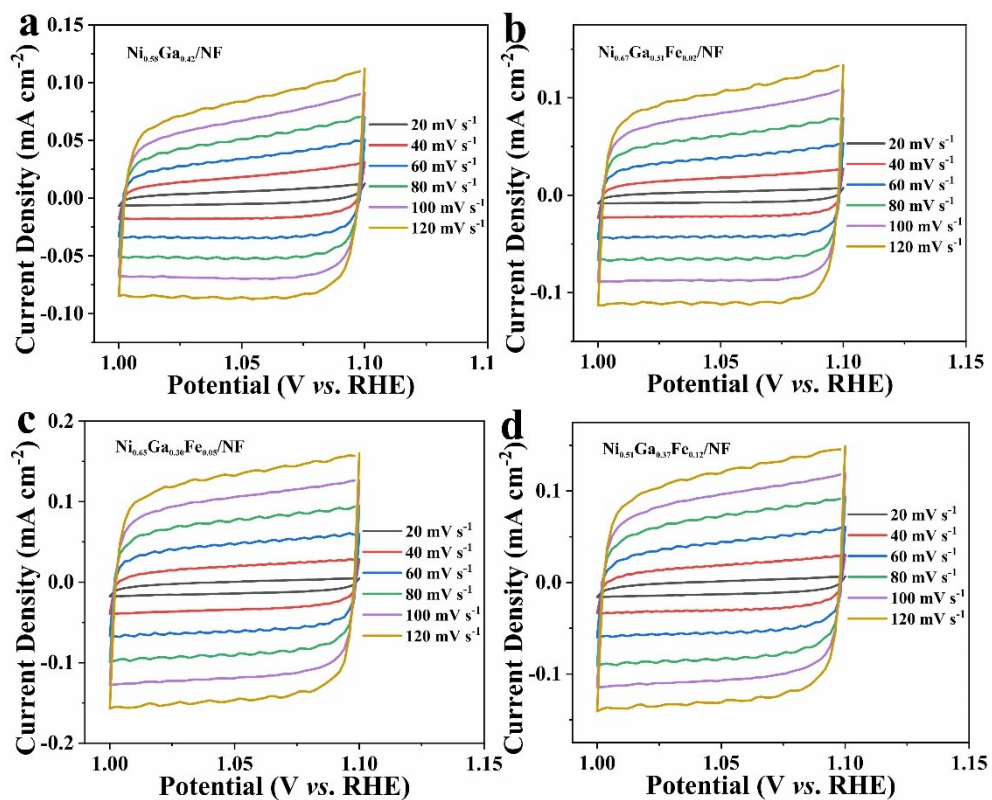

**Fig. S5** Cyclic voltammometry curves in the non-Faradaic region at various scan rates for (a)  $\text{Ni}_{0.58}\text{Ga}_{0.42}/\text{NF}$ , (b)  $\text{Ni}_{0.67}\text{Ga}_{0.31}\text{Fe}_{0.02}/\text{NF}$ , (c)  $\text{Ni}_{0.65}\text{Ga}_{0.30}\text{Fe}_{0.05}/\text{NF}$  and (d)  $\text{Ni}_{0.51}\text{Ga}_{0.37}\text{Fe}_{0.12}/\text{NF}$ .

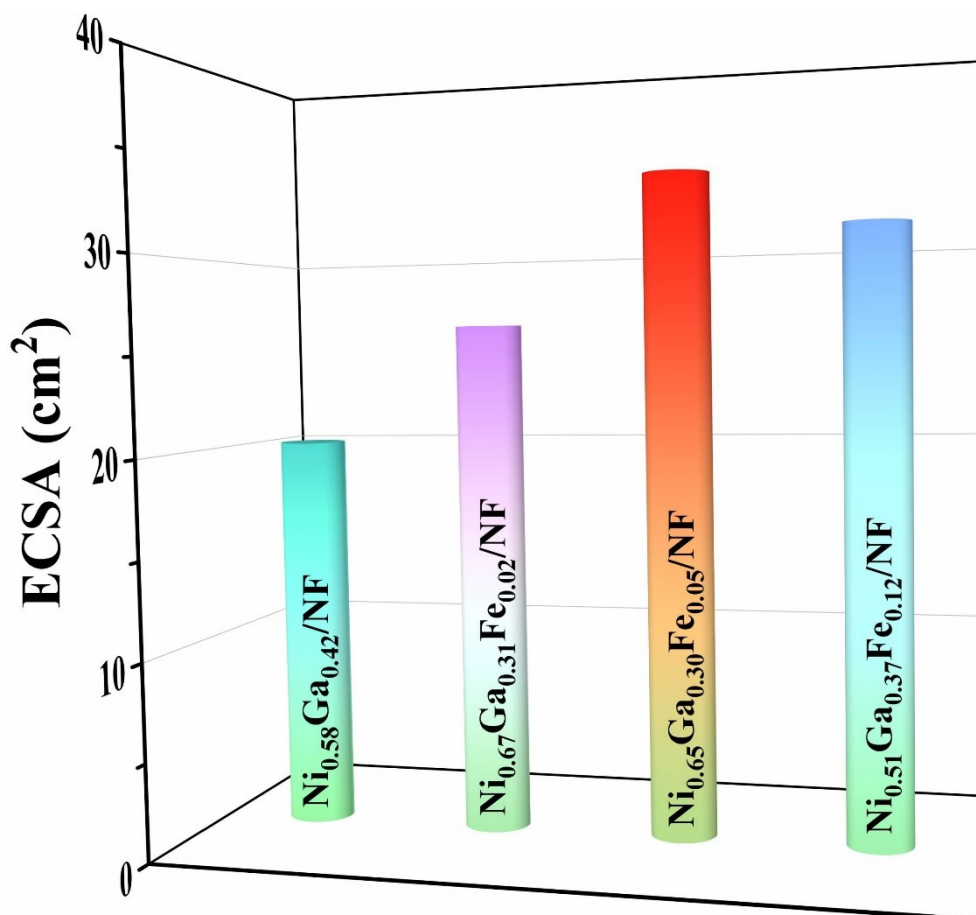

**Fig. S6** The calculated ECSA values of  $\text{Ni}_{0.58}\text{Ga}_{0.42}/\text{NF}$ ,  $\text{Ni}_{0.67}\text{Ga}_{0.31}\text{Fe}_{0.02}/\text{NF}$ ,  $\text{Ni}_{0.65}\text{Ga}_{0.30}\text{Fe}_{0.05}/\text{NF}$  and  $\text{Ni}_{0.51}\text{Ga}_{0.37}\text{Fe}_{0.12}/\text{NF}$ .

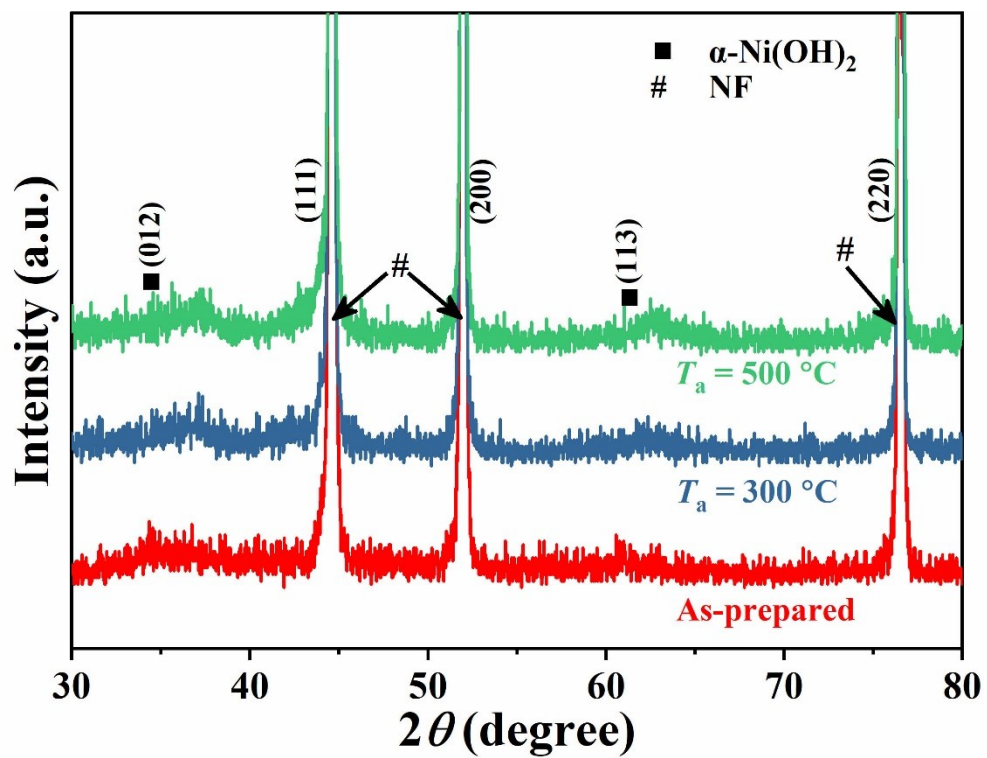

Fig. S7 XRD patterns of as-prepared and annealed (at 300 and 500 °C) Ni<sub>0.65</sub>Ga<sub>0.30</sub>Fe<sub>0.05</sub>/NF.

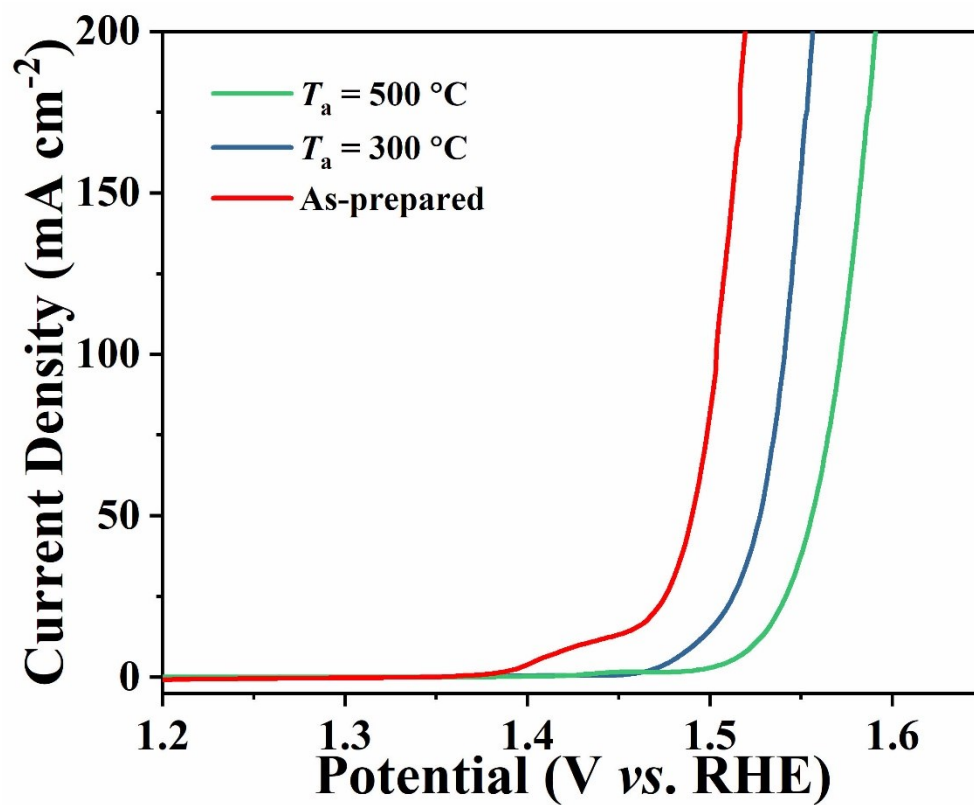

**Fig. S8** Polarization curves of as-prepared and annealed (at 300 and 500 °C)  $\text{Ni}_{0.65}\text{Ga}_{0.30}\text{Fe}_{0.05}/\text{NF}$  in 1 M KOH.

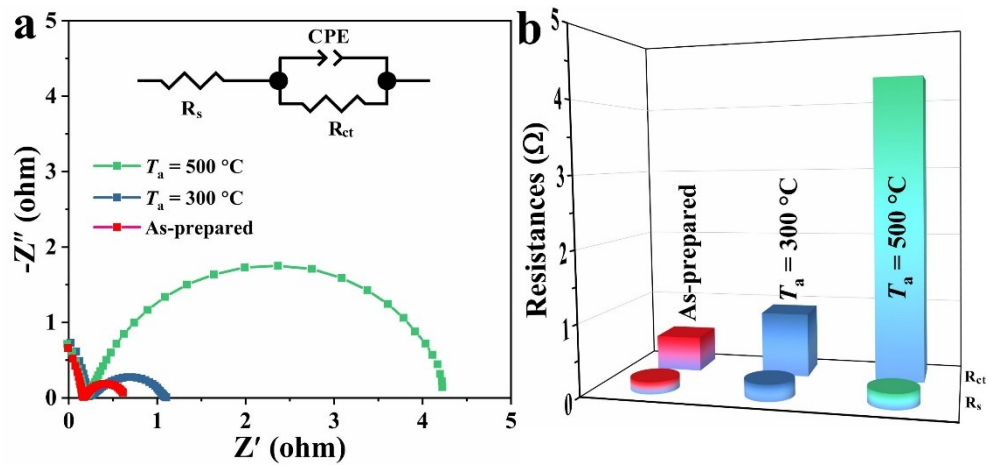

**Fig. S9** (a) Nyquist plots of as-prepared and annealed (at 300 and 500 °C)  $\text{Ni}_{0.65}\text{Ga}_{0.30}\text{Fe}_{0.05}/\text{NF}$ . (b) The corresponding charge transfer resistance ( $R_{ct}$ ) and solution resistance ( $R_s$ ). The inset in (a) shows an equivalent electrical circuit diagram.

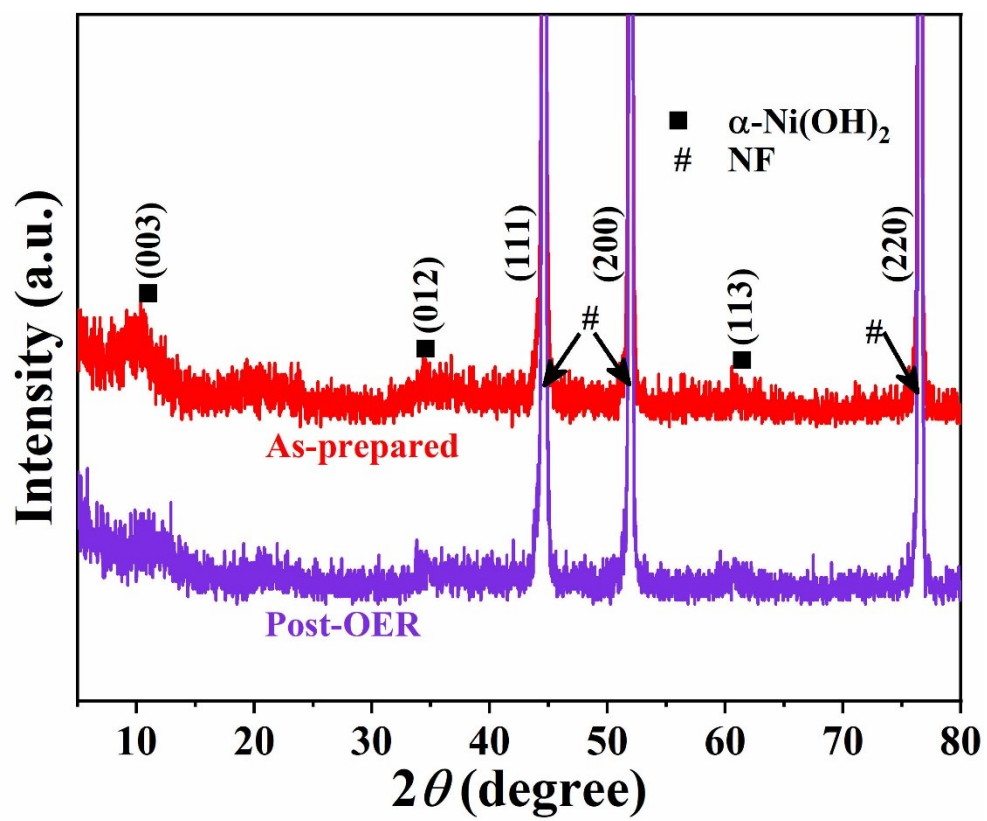

Fig. S10 XRD patterns of the as-prepared and post-OER samples.

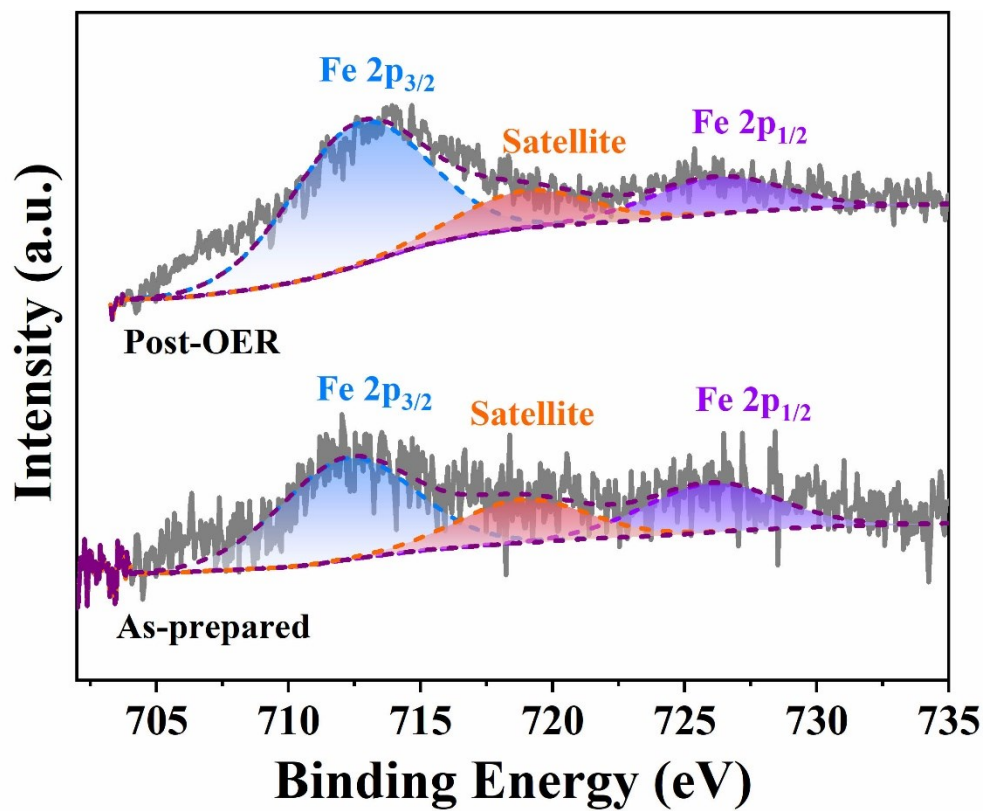

Fig. S11 Fe 2p XPS spectra of the as-prepared and post-OER samples.



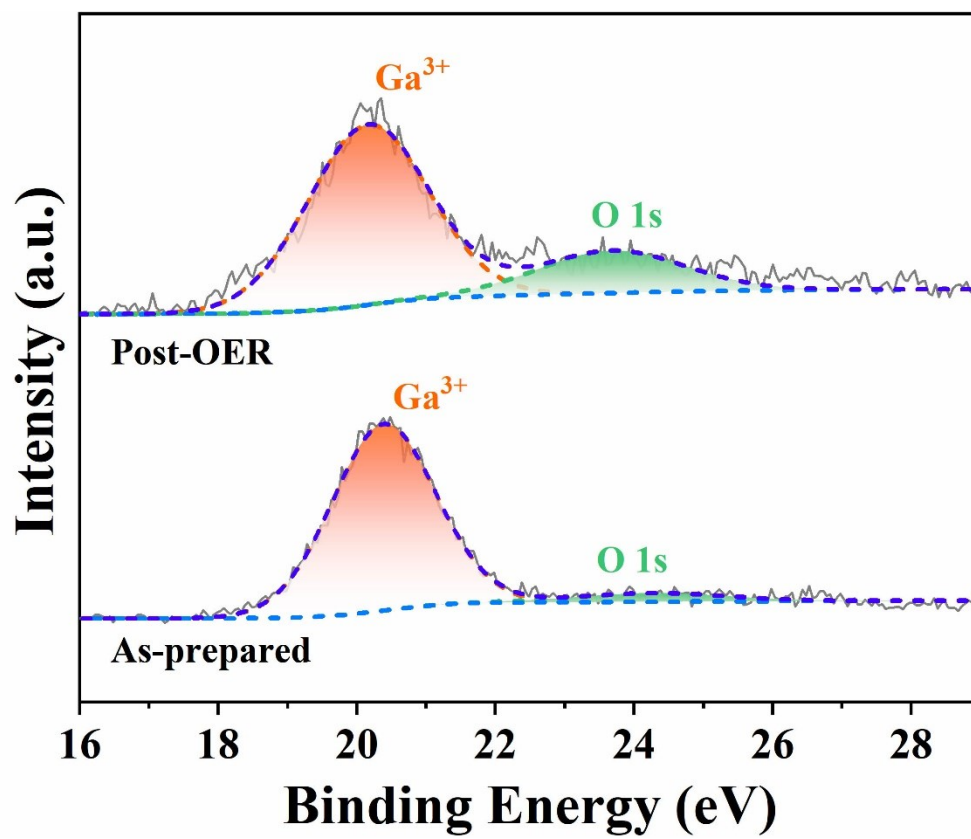

Fig. S12 Ga 3d XPS spectra of the as-prepared and post-OER samples.

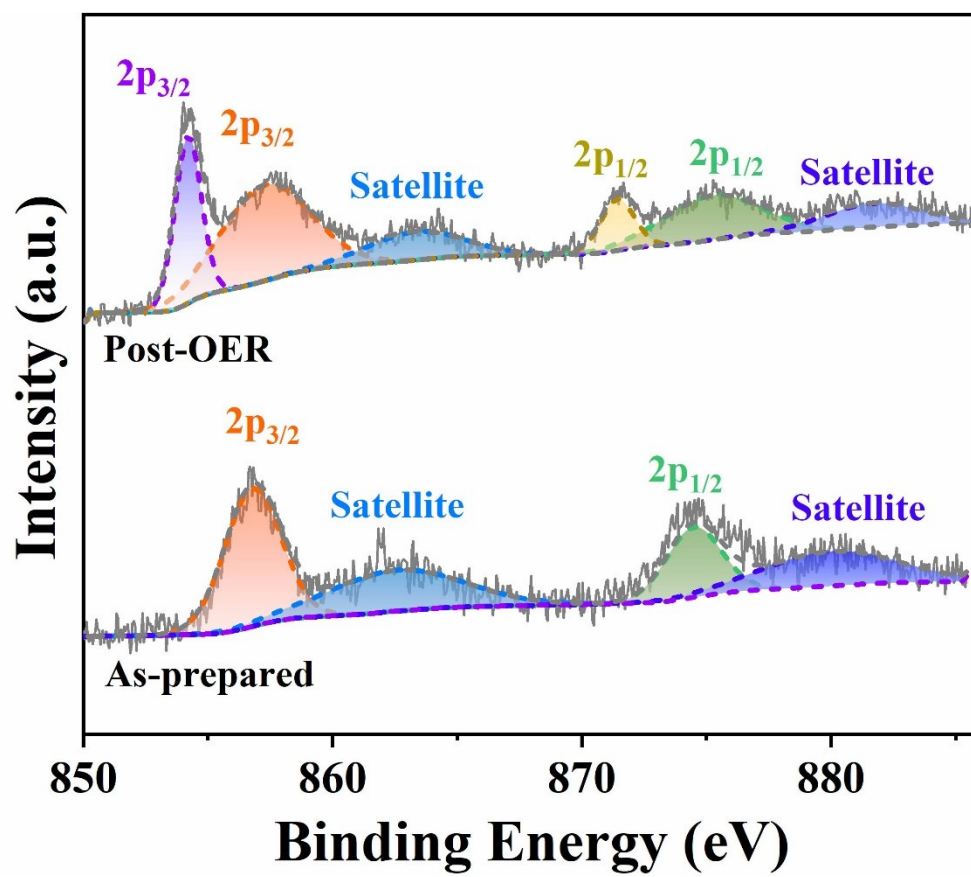

Fig. S13 Ni 2p XPS spectra of the as-prepared and post-OER samples.

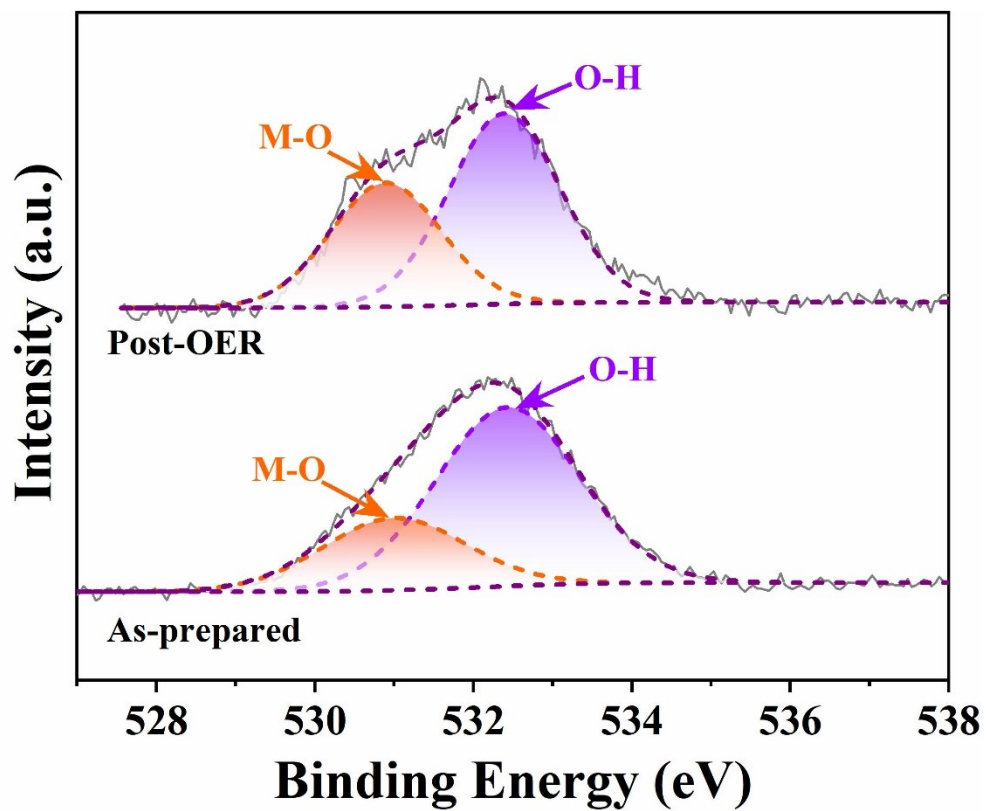

Fig. S14 O1s XPS spectra of the as-prepared and post-OER samples.

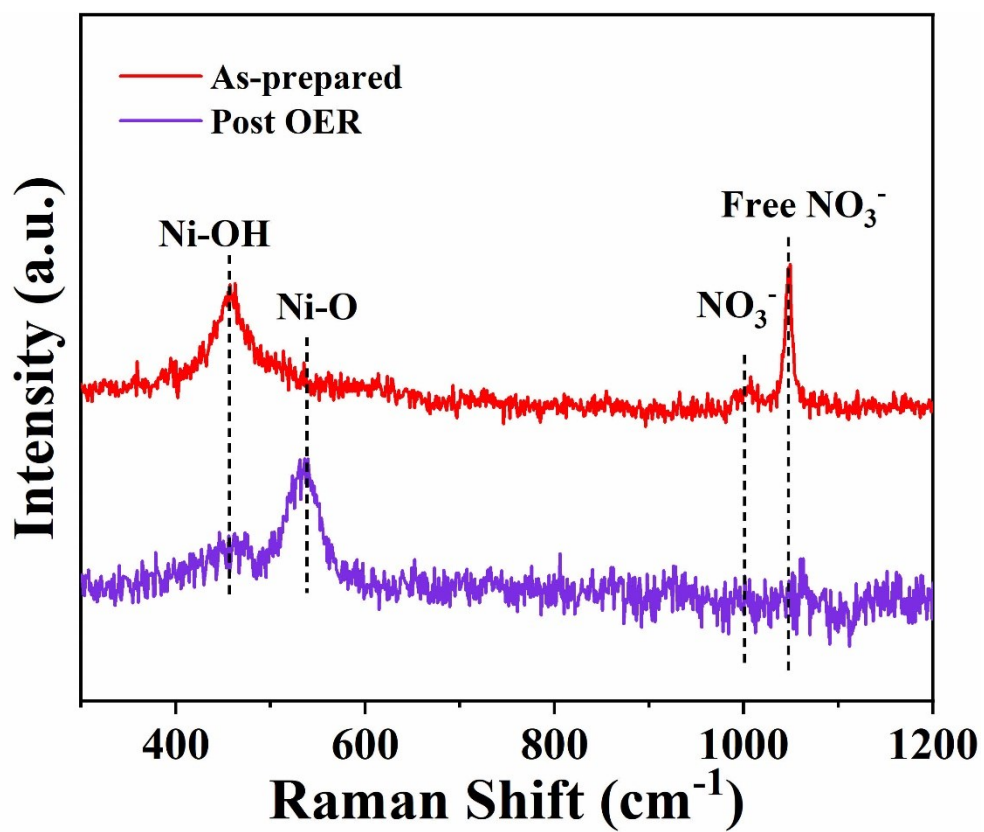

Fig. S15 Raman spectra of the as-prepared and post-OER samples.

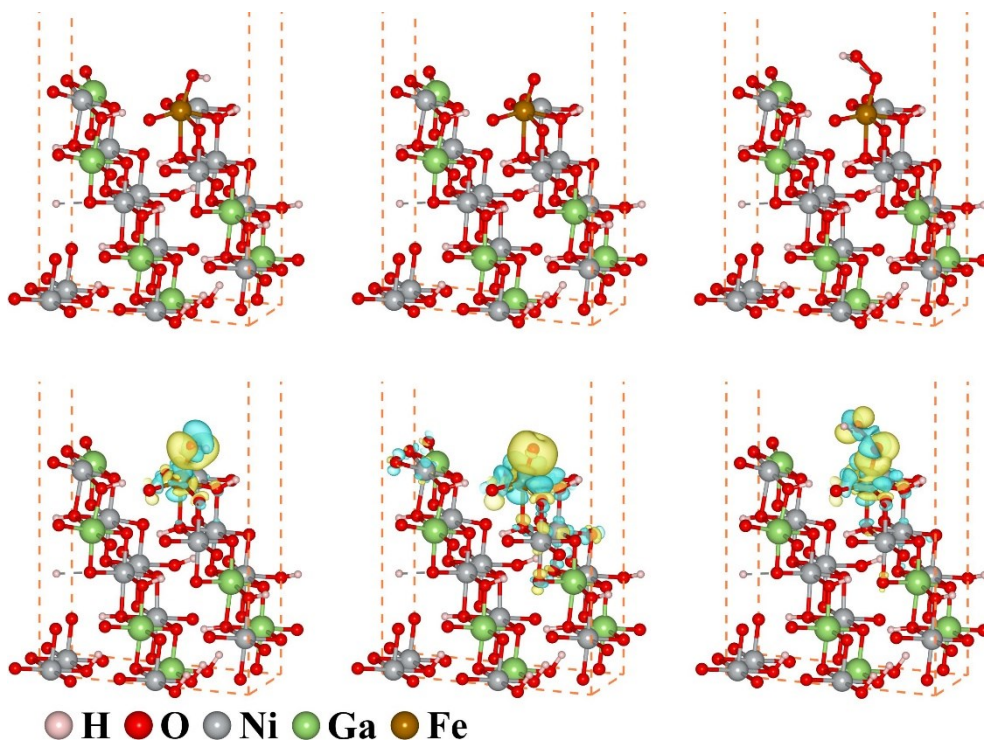

**Fig. S16** Differential charge density plots of NiGaFeOOH during the OER process. Yellow and blue areas represent electronic excess and depletion, respectively.

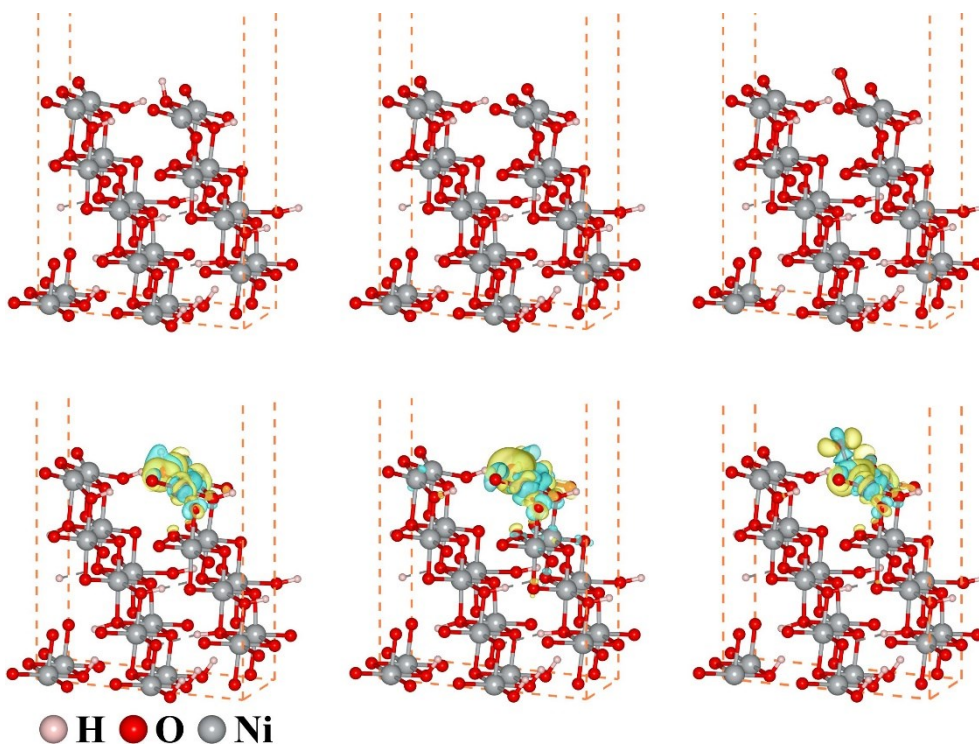

**Fig. S17** Differential charge density plots of NiOOH during the OER process. Yellow and blue areas represent electronic excess and depletion, respectively.

**Table S1** Comparisons of overpotentials at 10 mA cm<sup>-2</sup> and Tafel slopes among Ni<sub>0.65</sub>Ga<sub>0.30</sub>Fe<sub>0.05</sub>/NF and most of reported OER electrocatalysts in 1 M KOH.

| Catalysts                                                                    | Overpotential (mV) at<br>10 mA cm <sup>-2</sup> | Tafel slope<br>(mV dec <sup>-1</sup> ) | Ref.                           |
|------------------------------------------------------------------------------|-------------------------------------------------|----------------------------------------|--------------------------------|
| Ni <sub>0.65</sub> Ga <sub>0.30</sub> Fe <sub>0.05</sub> /NF                 | 200                                             | 42                                     | This work                      |
| FeCoW oxy-hydroxides/Au                                                      | 191                                             | /                                      | Ref. <sup>9</sup> of the text  |
| S-NiCoFe LDH                                                                 | 206                                             | 46                                     | Ref. <sup>10</sup> of the text |
| CoFePi/Ni(PO <sub>3</sub> ) <sub>2</sub> /CC                                 | 213                                             | 39                                     | Ref. <sup>11</sup> of the text |
| FeNiO/CC                                                                     | 218                                             | 47                                     | Ref. <sup>12</sup> of the text |
| Co <sub>0.8</sub> Fe <sub>0.2</sub> OOH@C                                    | 254                                             | 33                                     | Ref. <sup>13</sup> of the text |
| NiVIr-LDH                                                                    | 180                                             | 38                                     | Ref. <sup>14</sup> of the text |
| NiFeRu-LDH                                                                   | 225                                             | 32                                     | Ref. <sup>15</sup> of the text |
| MoFe:Ni(OH) <sub>2</sub> /NiOOH                                              | 240                                             | 47                                     | Ref. <sup>17</sup> of the text |
| Ni-Fe hydroxides                                                             | 270                                             | 36                                     | Ref. <sup>21</sup> of the text |
| e-ICLDH@GDY/NF                                                               | 216                                             | 44                                     | Ref. <sup>45</sup> of the text |
| W <sub>0.5</sub> Co <sub>0.4</sub> Fe <sub>0.1</sub> /NF                     | 250                                             | 32                                     | Ref. <sup>46</sup> of the text |
| NiFe/NF                                                                      | 215                                             | 28                                     | Ref. <sup>54</sup> of the text |
| NiCo LDH nanosheets                                                          | 367                                             | 40                                     | 9                              |
| W-Ni(OH) <sub>2</sub>                                                        | 237                                             | 33                                     | 10                             |
| NiFe-LDH                                                                     | 348                                             | /                                      | 11                             |
| NiV LDH                                                                      | 318                                             | 50                                     | 12                             |
| Fe-doped β-Ni(OH) <sub>2</sub>                                               | 219                                             | 53                                     | 13                             |
| NiFe-LDHNS@DG10                                                              | 210                                             | 52                                     | 14                             |
| CCS Ni-Co Nw                                                                 | 302                                             | 44                                     | 15                             |
| P-FeNiO/CNS                                                                  | 220                                             | 52                                     | 16                             |
| Ag@Co(OH) <sub>x</sub> /CC                                                   | 250                                             | 76                                     | 17                             |
| NiTe/NiS                                                                     | 209                                             | 49                                     | 18                             |
| Fe-doped NiO <sub>x</sub> nanosheets                                         | 310                                             | 49                                     | 19                             |
| CoZn(20:1)-P-NS@NF                                                           | 209                                             | 52                                     | 20                             |
| NF@NC-CoFe <sub>2</sub> O <sub>4</sub> /C NRAs                               | 240                                             | 45                                     | 21                             |
| Ni(OH) <sub>2</sub> -NP                                                      | 260                                             | 79                                     | 22                             |
| NiFe LDH@NiCoP/NF                                                            | 220                                             | 49                                     | 23                             |
| Co <sub>3</sub> O <sub>4</sub> /Fe <sub>0.33</sub> Co <sub>0.66</sub> P      | 215                                             | 60                                     | 24                             |
| F-CoOOH/NF                                                                   | 270                                             | 54                                     | 25                             |
| NiCoON                                                                       | 247                                             | 35                                     | 26                             |
| F <sub>0.25</sub> C <sub>1</sub> CH/NF                                       | 228                                             | 42                                     | 27                             |
| Fe <sub>17.5%</sub> -Ni <sub>3</sub> S <sub>2</sub> /NF                      | 214                                             | 42                                     | 28                             |
| Mn <sub>3</sub> N <sub>2</sub>                                               | 270                                             | 101                                    | 29                             |
| Fe/Ni/Mn <sub>0.4</sub> -MIL-53/NF                                           | 238                                             | 71                                     | 30                             |
| Co <sub>1.75</sub> Al <sub>1.25</sub> O <sub>4</sub>                         | 248                                             | 84                                     | 31                             |
| Fe <sub>3</sub> Co <sub>2</sub> Al <sub>2</sub> -AE                          | 284                                             | 100                                    | 32                             |
| (Ni <sub>2</sub> Co <sub>1</sub> ) <sub>0.925</sub> Fe <sub>0.075</sub> -MOF | 257                                             | 41                                     | 33                             |
| Co <sub>3</sub> O <sub>4</sub> /CeO <sub>2</sub> NHs                         | 270                                             | 60                                     | 34                             |

|                                                                        |     |    |    |
|------------------------------------------------------------------------|-----|----|----|
| Fe-Ni <sub>3</sub> C-2%                                                | 275 | 62 | 35 |
| YRCo-560                                                               | 250 | 34 | 36 |
| NP Au/CoMoN <sub>x</sub>                                               | 237 | 46 | 37 |
| NiSe <sub>2</sub> /CoSe <sub>2</sub> -N                                | 286 | 53 | 38 |
| V-CoP@a-CeO <sub>2</sub>                                               | 225 | 58 | 39 |
| Fe-CoP/CoO                                                             | 219 | 52 | 40 |
| Fe <sub>0.33</sub> Co <sub>0.67</sub> OOH PNSAs                        | 266 | 30 | 41 |
| NiCo@NiCoO <sub>2</sub> /C PMRAs                                       | 339 | 84 | 42 |
| NiFe-UMNs                                                              | 260 | 30 | 43 |
| S NiN <sub>x</sub> -PC/EG                                              | 280 | 45 | 44 |
| Fe <sub>0.09</sub> Co <sub>0.13</sub> -NiSe <sub>2</sub>               | 251 | 63 | 45 |
| NiFeMo                                                                 | 238 | 35 | 46 |
| CoV-UAH                                                                | 250 | 44 | 47 |
| CeO <sub>x</sub> /CoO <sub>x</sub>                                     | 313 | 66 | 48 |
| NiNO <sub>0+15</sub>                                                   | 300 | 74 | 49 |
| CoV <sub>2</sub> O <sub>6</sub> -V <sub>2</sub> O <sub>5</sub> /NRGO-1 | 239 | 50 | 50 |
| Mn@Co <sub>x</sub> Mn <sub>3-x</sub> O <sub>4</sub>                    | 246 | 46 | 51 |
| EO Co <sub>3</sub> Mo/Cu                                               | 220 | 82 | 52 |
| fcc-NiFe@NC                                                            | 226 | 41 | 53 |
| N-CoFe LDHs/NF                                                         | 233 | 40 | 54 |
| mesoporous Ni <sub>0.8</sub> Fe <sub>0.2</sub> film                    | 206 | 64 | 55 |
| FeNi-LDH/Ti <sub>3</sub> C <sub>2</sub> -MXene                         | 298 | 43 | 56 |
| CoOOH-NS                                                               | 253 | 87 | 57 |
| Ni-Fe LDH HNP                                                          | 280 | 49 | 58 |
| CoGa LDH                                                               | 258 | 34 | 59 |
| CoFe LDH nanosheets                                                    | 232 | 36 | 60 |



## Notes and references

- 1 J.-S. Sun, Y.-T. Zhou, R.-Q. Yao, H. Shi, Z. Wen, X.-Y. Lang, Q. Jiang, *J. Mater. Chem. A*, 2019, **7**, 9690-9697.
- 2 B. Delley, *J. Chem. Phys.*, 2000, **113**, 7756-7764.
- 3 J. P. Perdew, K. Burke, M. Ernzerhof, *Phys. Rev. Lett.*, 1996, **77**, 3865.
- 4 B. Delley, *Phys. Rev. B*, 2002, **66**, 155125.
- 5 S. Grimme, *J. Comput. Chem.*, 2006, **27**, 1787-1799.
- 6 F. L. Hirshfeld, *Theor. Chim. Acta*, 1977, **44**, 129-138.
- 7 J. K. Nørskov, T. Bligaard, A. Logadottir, J. Kitchin, J. G. Chen, S. Pandalov, U. Stimming, *J. Electrochem. Soc.*, 2005, **152**, J23.
- 8 J. H. Montoya, C. Tsai, A. Vojvodic, J. K. Nørskov, *ChemSusChem*, 2015, **8**, 2180-2186.
- 9 H. Liang, F. Meng, M. Caban-Acevedo, L. Li, A. Forticaux, L. Xiu, Z. Wang, S. Jin, *Nano Lett.*, 2015, **15**, 1421-1427.
- 10 J. Yan, L. Kong, Y. Ji, J. White, Y. Li, J. Zhang, P. An, S. Liu, S. T. Lee, T. Ma, *Nat. Commun.*, 2019, **10**, 2149.
- 11 F. Dionigi, Z. Zeng, I. Sinev, T. Merzdorf, S. Deshpande, M. B. Lopez, S. Kunze, I. Zegkinoglou, H. Sarodnik, D. Fan, A. Bergmann, J. Drnec, J. F. Araujo, M. Gliech, D. Teschner, J. Zhu, W. X. Li, J. Greeley, B. R. Cuenya, P. Strasser, *Nat. Commun.*, 2020, **11**, 2522.
- 12 K. Fan, H. Chen, Y. Ji, H. Huang, P. M. Claesson, Q. Daniel, B. Philippe, H. Rensmo, F. Li, Y. Luo, L. Sun, *Nat. Commun.*, 2016, **7**, 11981.
- 13 T. Kou, S. Wang, J. L. Hauser, M. Chen, S. R. J. Oliver, Y. Ye, J. Guo, Y. Li, *ACS*

- Energy Lett.*, 2019, **4**, 622-628.
- 14 Y. Jia, L. Zhang, G. Gao, H. Chen, B. Wang, J. Zhou, M. T. Soo, M. Hong, X. Yan, G. Qian, J. Zou, A. Du, X. Yao, *Adv. Mater.*, 2017, **29**, 1700017.
  - 15 S.-H. Bae, J.-E. Kim, H. Randriamahazaka, S.-Y. Moon, J.-Y. Park, I.-K. Oh, *Adv. Energy Mater.*, 2017, **7**, 1601492.
  - 16 Z. Liu, B. Tang, X. Gu, H. Liu, L. Feng, *Chem. Eng. J.*, 2020, **395**, 125170.
  - 17 Z. Zhang, X. Li, C. Zhong, N. Zhao, Y. Deng, X. Han, W. Hu, *Angew. Chem. Int. Ed.*, 2020, **59**, 7245-7250.
  - 18 Z. Xue, X. Li, Q. Liu, M. Cai, K. Liu, M. Liu, Z. Ke, X. Liu, G. Li, *Adv. Mater.*, 2019, **31**, e1900430.
  - 19 G. Wu, W. Chen, X. Zheng, D. He, Y. Luo, X. Wang, J. Yang, Y. Wu, W. Yan, Z. Zhuang, X. Hong, Y. Li, *Nano Energy*, 2017, **38**, 167-174.
  - 20 X. Xiao, C.-T. He, S. Zhao, J. Li, W. Lin, Z. Yuan, Q. Zhang, S. Wang, L. Dai, D. Yu, *Energy Environ. Sci.*, 2017, **10**, 893-899.
  - 21 X. F. Lu, L. F. Gu, J. W. Wang, J. X. Wu, P. Q. Liao, G. R. Li, *Adv. Mater.*, 2017, **29**, 1604437.
  - 22 C. Luan, G. Liu, Y. Liu, L. Yu, Y. Wang, Y. Xiao, H. Qiao, X. Dai, X. Zhang, *ACS Nano*, 2018, **12**, 3875-3885.
  - 23 H. J. Zhang, X. P. Li, A. Hahnel, V. Naumann, C. Lin, S. Azimi, S. L. Schweizer, A. W. Maijenburg, R. B. Wehrspohn, *Adv. Funct. Mater.*, 2018, **28**, 1706847.
  - 24 X. Zhang, J. Li, Y. Yang, S. Zhang, H. Zhu, X. Zhu, H. Xing, Y. Zhang, B. Huang, S. Guo, E. Wang, *Adv. Mater.*, 2018, **30**, e1803551.

- 25 P. Chen, T. Zhou, S. Wang, N. Zhang, Y. Tong, H. Ju, W. Chu, C. Wu, Y. Xie, *Angew. Chem. Int. Ed.*, 2018, **57**, 15471-15475.
- 26 Y. Li, L. Hu, W. Zheng, X. Peng, M. Liu, P. K. Chu, L. Y. S. Lee, *Nano Energy*, 2018, **52**, 360-368.
- 27 L. Hui, Y. Xue, D. Jia, H. Yu, C. Zhang, Y. Li, *Adv. Energy Mater.*, 2018, **8**, 1800175.
- 28 G. Zhang, Y.-S. Feng, W.-T. Lu, D. He, C.-Y. Wang, Y.-K. Li, X.-Y. Wang, F.-F. Cao, *ACS Catal.*, 2018, **8**, 5431-5441.
- 29 C. Walter, P. W. Menezes, S. Orthmann, J. Schuch, P. Connor, B. Kaiser, M. Lerch, M. Driess, *Angew. Chem. Int. Ed.*, 2018, **57**, 698-702.
- 30 F. L. Li, Q. Shao, X. Huang, J. P. Lang, *Angew. Chem. Int. Ed.*, 2018, **57**, 1888-1892.
- 31 X. Wang, P. Sun, H. Lu, K. Tang, Q. Li, C. Wang, Z. Mao, T. Ali, C. Yan, *Small*, 2019, **15**, e1804886.
- 32 Y. Sun, Y. Xia, L. Kuai, H. Sun, W. Cao, M. Huttula, A. P. Honkanen, M. Viljanen, S. Huotari, B. Geng, *ChemSusChem*, 2019, **12**, 2564-2569.
- 33 Q. Qian, Y. Li, Y. Liu, L. Yu, G. Zhang, *Adv. Mater.*, 2019, **31**, e1901139.
- 34 Y. Liu, C. Ma, Q. Zhang, W. Wang, P. Pan, L. Gu, D. Xu, J. Bao, Z. Dai, *Adv. Mater.*, 2019, **31**, e1900062.
- 35 H. Fan, H. Yu, Y. Zhang, Y. Zheng, Y. Luo, Z. Dai, B. Li, Y. Zong, Q. Yan, *Angew. Chem. Int. Ed.*, 2017, **56**, 12566-12570.
- 36 M. Kim, B. Lee, H. Ju, S. W. Lee, J. Kim, *Adv. Mater.*, 2019, **31**, e1901977.

- 37 R. Q. Yao, H. Shi, W. B. Wan, Z. Wen, X. Y. Lang, Q. Jiang, *Adv. Mater.*, 2020, **32**, e1907214.
- 38 X. Zheng, X. Han, Y. Cao, Y. Zhang, D. Nordlund, J. Wang, S. Chou, H. Liu, L. Li, C. Zhong, Y. Deng, W. Hu, *Adv. Mater.*, 2020, **32**, e2000607.
- 39 L. Yang, R. Liu, L. Jiao, *Adv. Funct. Mater.*, 2020, **30**, 1909618.
- 40 X. Hu, S. Zhang, J. Sun, L. Yu, X. Qian, R. Hu, Y. Wang, H. Zhao, J. Zhu, *Nano Energy*, 2019, **56**, 109-117.
- 41 S. H. Ye, Z. X. Shi, J. X. Feng, Y. X. Tong, G. R. Li, *Angew. Chem. Int. Ed.*, 2018, **57**, 2672-2676.
- 42 H. Xu, Z. X. Shi, Y. X. Tong, G. R. Li, *Adv. Mater.*, 2018, **30**, e1705442.
- 43 G. Hai, X. Jia, K. Zhang, X. Liu, Z. Wu, G. Wang, *Nano Energy*, 2018, **44**, 345-352.
- 44 Y. Hou, M. Qiu, M. G. Kim, P. Liu, G. Nam, T. Zhang, X. Zhuang, B. Yang, J. Cho, M. Chen, C. Yuan, L. Lei, X. Feng, *Nat. Commun.*, 2019, **10**, 1392.
- 45 Y. Sun, K. Xu, Z. Wei, H. Li, T. Zhang, X. Li, W. Cai, J. Ma, H. J. Fan, Y. Li, *Adv. Mater.*, 2018, **30**, e1802121.
- 46 F. Qin, Z. Zhao, M. K. Alam, Y. Ni, F. Robles-Hernandez, L. Yu, S. Chen, Z. Ren, Z. Wang, J. Bao, *ACS Energy Lett.*, 2018, **3**, 546-554.
- 47 J. Z. Liu, Y. F. Ji, J. W. Nai, X. G. Niu, Y. Luo, L. Guo, S. H. Yang, *Energy Environ. Sci.*, 2018, **11**, 1736-1741.
- 48 J.-H. Kim, K. Shin, K. Kawashima, D. H. Youn, J. Lin, T. E. Hong, Y. Liu, B. R. Wygant, J. Wang, G. Henkelman, C. B. Mullins, *ACS Catal.*, 2018, **8**, 4257-4265.

- 49 J. Huang, Y. Sun, X. Du, Y. Zhang, C. Wu, C. Yan, Y. Yan, G. Zou, W. Wu, R. Lu, Y. Li, J. Xiong, *Adv. Mater.*, 2018, **30**, e1803367.
- 50 F.-C. Shen, Y. Wang, Y.-J. Tang, S.-L. Li, Y.-R. Wang, L.-Z. Dong, Y.-F. Li, Y. Xu, Y.-Q. Lan, *ACS Energy Lett.*, 2017, **2**, 1327-1333.
- 51 C. Hu, L. Zhang, Z. J. Zhao, J. Luo, J. Shi, Z. Huang, J. Gong, *Adv. Mater.*, 2017, **29**, 1701820.
- 52 H. Shi, Y. T. Zhou, R. Q. Yao, W. B. Wan, X. Ge, W. Zhang, Z. Wen, X. Y. Lang, W. T. Zheng, Q. Jiang, *Nat. Commun.*, 2020, **11**, 2940.
- 53 C. Wang, H. Yang, Y. Zhang, Q. Wang, *Angew. Chem. Int. Ed.*, 2019, **58**, 6099-6103.
- 54 Y. Wang, C. Xie, Z. Zhang, D. Liu, R. Chen, S. Wang, *Adv. Funct. Mater.*, 2018, **28**, 1703363.
- 55 M. Yao, N. Wang, W. Hu, S. Komarneni, *Appl. Catal. B: Environ.*, 2018, **233**, 226-233.
- 56 M. Yu, S. Zhou, Z. Wang, J. Zhao, J. Qiu, *Nano Energy*, 2018, **44**, 181-190.
- 57 J. Zhou, Y. Wang, X. Su, S. Gu, R. Liu, Y. Huang, S. Yan, J. Li, S. Zhang, *Energy Environ. Sci.*, 2019, **12**, 739-746.
- 58 L. Yu, J. F. Yang, B. Y. Guan, Y. Lu, X. W. D. Lou, *Angew. Chem. Int. Ed.*, 2018, **57**, 172-176.
- 59 J. Zhang, C. Dong, Z. Wang, H. Gao, J. Niu, Z. Peng, Z. Zhang, *Small Methods*, 2018, **3**, 1800286.
- 60 R. Liu, Y. Wang, D. Liu, Y. Zou, S. Wang, *Adv. Mater.*, 2017, **29**, 1701546.
